# Supplementary material for: Myeloperoxidase Oxidized LDL Interferes with Endothelial Cell Motility through miR-22 and Heme Oxygenase 1 Induction: Possible Involvement in Reendothelialization of Vascular Injuries
Source: Hindawi journal article supplement (doi:10.1155/2014/134635), 2014-01-01
Supplement: f1 [file 134635.f1.pdf]

## *Supporting information*

*Supplementary figures*

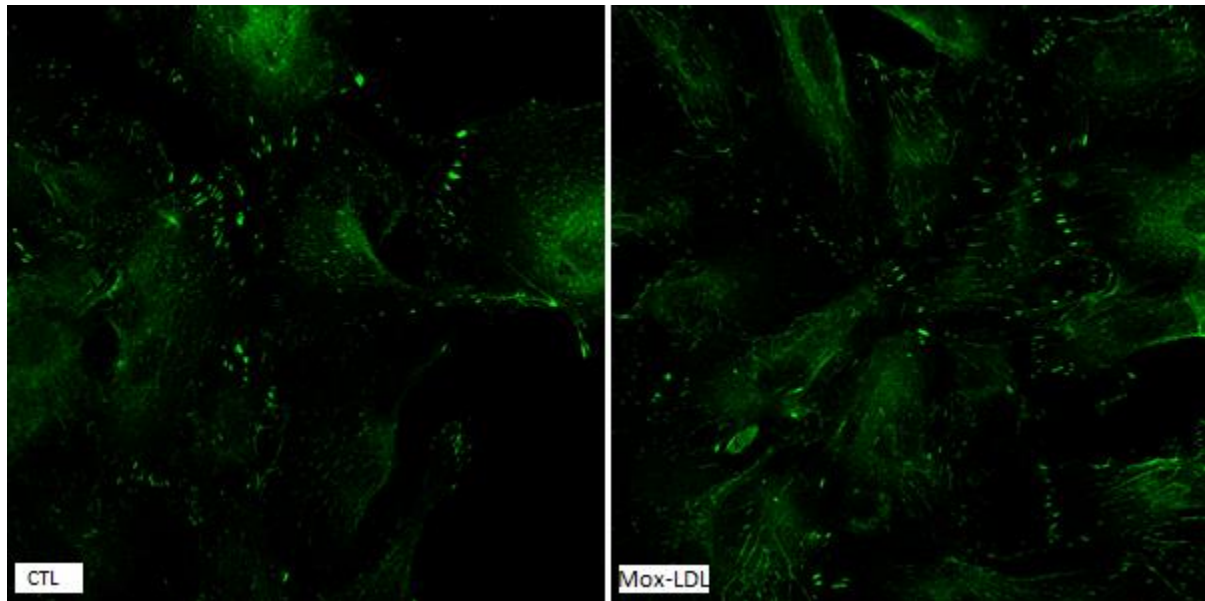

Supplementary Figure I. Control (CTL) mock-treated and Mox-LDL (Mox-LDL) treated HUVECs were subjected to confocal microscopy analysis to detect the patterning of focal adhesions using paxillin IF staining. Cells were cultured in the presence or absence of Mox-LDL for 24 hours, fixed and processed for immunofluorescence.

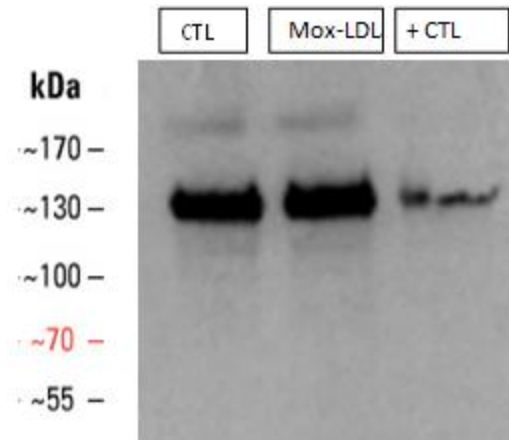

Supplementary Figure II. Western blot analysis of control (CTL) mock-treated and Mox-LDL (Mox-LDL) treated HUVECs using an anti phospho-FAK antibody. Cells were cultured in the presence or absence of Mox-LDL for 24 hours. HepG2 protein extract was used as a positive control (+ CTL).

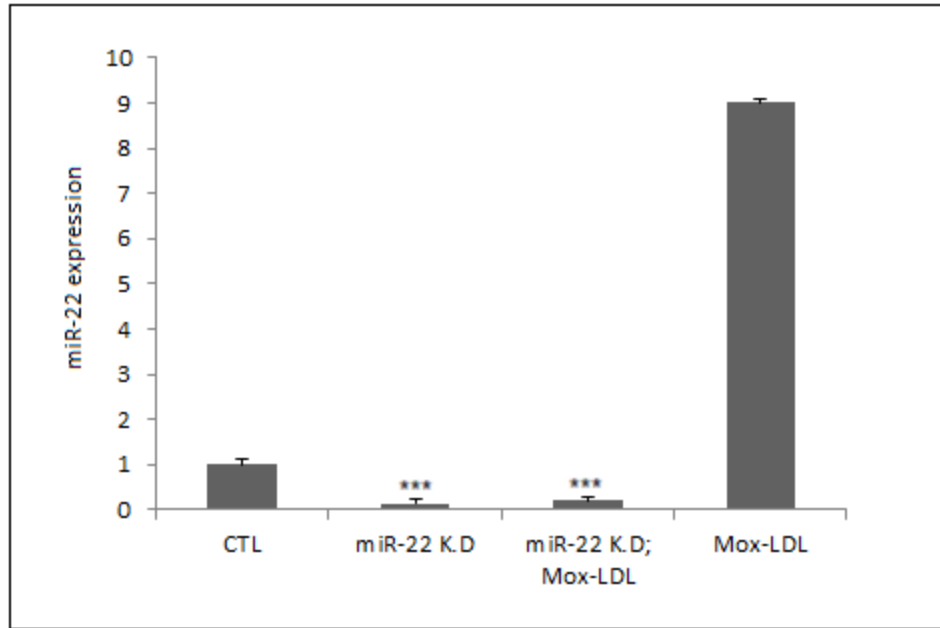

Supplementary Figure III. Differential miR-22 expression between HUVECs submitted to different treatments: CTL (control mock-treated cells), miR-22 K.D (cells treated with miR-22 inhibitor), miR-22 K.D ; Mox-LDL (cells treated with miR-22 inhibitor and Mox-LDL) and Mox-LDL (cells treated with Mox-LDL). Total RNA was extracted and analyzed by qRT-PCR using miR-22-specific primers. Pooled data from 3 independent experiments are shown. \*\*\*,  $p < 0.001$  (Student's  $t$  test).

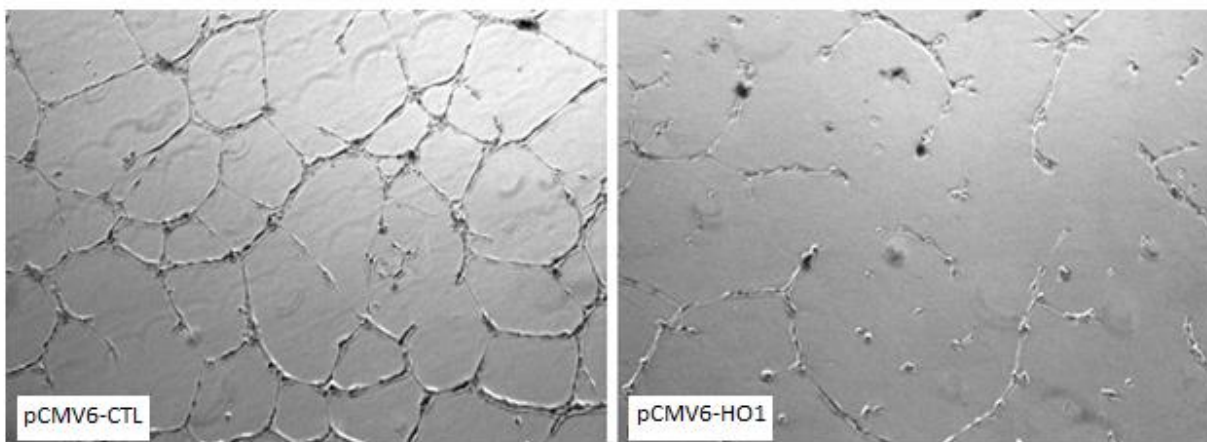

Supplementary Figure VI. The effect of HO-1 overexpression on HUVEC tubulogenesis . A) Representative fields of HUVEC cultures in tubulogenic conditions. HUVECs were transfected with either a control empty pCMV6 vector or the same vector containing HO-1 ORF for overexpression. Afterwards, cells were cultured for 24 hours. HUVECs were then seeded on MATRIGEL™ and incubated overnight.

*Supplementary tables*

| Rank | Gene Name    | Fold Change |
|------|--------------|-------------|
| 1    | HMOX1 (HO-1) | 11.098827   |
| 2    | ANGPTL4      | 3.54599     |
| 3    | FLT1         | -2.048766   |
| 4    | TNF          | 49.373841   |
| 5    | ANG          | 1.862989    |
| 6    | ERBB2        | 2.042583    |
| 7    | GDF5         | -2.042658   |
| 8    | ITGB3        | -2.446958   |
| 9    | F3           | 2.259589    |
| 10   | MMP14        | 1.94062     |
| 11   | STC1         | -4.21923    |
| 12   | VEGFC        | -1.617768   |
| 13   | MET          | -1.926857   |
| 14   | PTEN         | -1.994231   |
| 15   | CXCR4        | 1.463703    |
| 16   | BIRC5        | -1.896081   |
| 17   | IL18         | 1.734897    |
| 18   | PTN          | 7.617571    |
| 19   | ENG          | 2.058152    |
| 20   | AKT1         | 1.793787    |
| 21   | CTGF         | -1.834454   |
| 22   | FGF2         | -1.461817   |
| 23   | ITGB1        | -1.794913   |
| 24   | IL6          | -1.533378   |
| 25   | ITGAV        | -1.44376    |
| 26   | HIF1A        | -1.273682   |
| 27   | MYC          | -2.207365   |
| 28   | TNFSF15      | 1.521195    |
| 29   | HOXD3        | 1.334072    |
| 30   | CSF1         | 1.704672    |
| 31   | KDR          | -1.601133   |
| 32   | EPHB4        | 1.568042    |
| 33   | CAV1         | -1.571543   |
| 34   | Hs18s        | 1.338716    |

|    |           |             |
|----|-----------|-------------|
| 35 | FLT4      | 1.591639    |
| 36 | VEGFA     | -1.219629   |
| 37 | BMX       | -1.529389   |
| 38 | IGFBP3    | -1.44343    |
| 39 | ANGPT1    | -2.116423   |
| 40 | ANPEP     | 1.195922    |
| 41 | TEK       | -1.472871   |
| 42 | EFNB2     | -1.356693   |
| 43 | FIGF      | 1.223317    |
| 44 | PECAM1    | -1.329769   |
| 45 | PGF       | 1.71445     |
| 46 | AGTR1     | 1.815252    |
| 47 | RAC1      | -1.151049   |
| 48 | HSGenomic | 1.767624    |
| 49 | SPP1      | 2.69479     |
| 50 | DLL4      | -1.151107   |
| 51 | ANGPT4    | -2.084858   |
| 52 | ACVRL1    | 1.620393    |
| 53 | NOS3      | -1.208613   |
| 54 | VEGFB     | 1.116112    |
| 55 | ANGPT2    | -1.166612   |
| 56 | EPHA2     | 1.337519    |
| 57 | EDN1      | -1.148181   |
| 58 | ETS1      | -1.376352   |
| 59 | COL18A1   | 1.180191    |
| 60 | ANGPTL6   | 1.120029    |
| 61 | SSTR2     | -273.450392 |
| 62 | HPSE      | -1.070885   |
| 63 | PDGFB     | 1.621356    |
| 64 | TGFB1     | -2.243904   |
| 65 | TIMP1     | -1.176056   |
| 66 | CEACAM1   | -1.058709   |
| 67 | HGF       | 1.853062    |
| 68 | MIF       | 1.281158    |
| 69 | SPARC     | 1.040428    |
| 70 | SERPINE1  | 1.250923    |
| 71 | NOS2      | -215.498894 |

|    |          |             |
|----|----------|-------------|
| 72 | PTGS2    | 1.064404    |
| 73 | NRP1     | 1.018726    |
| 74 | ITGA5    | 1.141821    |
| 75 | THBS1    | 1.067319    |
| 76 | CYR61    | -1.12108    |
| 77 | MAPK7    | 1.153725    |
| 78 | EPOR     | 1.097062    |
| 79 | TYMP     | 1.156345    |
| 80 | STAT3    | 1.097638    |
| 81 | VASH1    | 1.088242    |
| 82 | TP53     | -1.02341    |
| 83 | ID1      | 1.030433    |
| 84 | BSG      | 1.117271    |
| 85 | MMP2     | 1.046882    |
| 86 | CXCL12   | 1.366611    |
| 87 | SERPINF1 | -1.06559    |
| 88 | ANGPTL3  | -1.403216   |
| 89 | CCL2     | 1.01938     |
| 90 | MMP9     | -1.0471     |
| 91 | IL1B     | 2.809877    |
| 92 | ANGPTL1  | 1.954176    |
| 93 | FGF1     | 1.520392    |
| 94 | SERPINB5 | 15.988917   |
| 95 | CXCR2    | 8.999235    |
| 96 | LEP      | -261.630054 |

Supplementary Table I. Shows the results of the human Angiogenesis StellarArray™ technique which was used to study the expression of 94 pre-selected genes involved in angiogenesis pathways. The table shows the complete list of genes with their fold change in expression levels in Mox-LDL treated condition as compared to the control condition (control mock-treated). Treatment of HUVECs with Mox-LDL significantly altered the expression of only one gene, the Heme Oxygenase 1 (HO-1) gene, which saw an 11-fold increase in its expression level.



| <b>microRNA</b> | <b>Fold Change</b> |
|-----------------|--------------------|
| hsa-miR-107     | 2.4313             |
| hsa- miR-133a   | 6.935              |
| hsa- miR-134    | 0.3036             |
| hsa- miR-188-3p | 3.3762             |
| hsa- miR-200b   | 3.9903             |
| hsa- miR-203    | 16.5497            |
| hsa- miR-22     | 550.8621           |
| hsa- miR-29c    | 2.124              |
| hsa- miR-449a   | 0.5709             |
| hsa- miR-449b   | 0.5709             |
| hsa- miR-502-3p | 11.3658            |
| hsa- miR-505    | 0.0081             |
| hsa- miR-518b   | 0.0947             |
| hsa- miR-629    | 8.2102             |
| hsa- miR-636    | 0.1267             |
| hsa- miR-652    | 0.2063             |
| hsa- miR-672    | 0.19               |
| hsa- miR-708    | 3.7797             |

Supplementary Table II. TLDA results showing the list of miRs that were identified to be differentially expressed exclusively in Mox-LDL treated HUVECs with their fold change in expression levels as compared to the control condition (control mock-treated). HUVEC were incubated for 24 hours in culture medium supplemented with mock medium, native LDL or Mox-LDL. Total RNA was extracted and analyzed by making use of the Taqman Low Density Array (TLDA) method.

| <b>microRNA</b> | <b>Fold Change</b> |
|-----------------|--------------------|
| hsa- miR-133a   | 4.021              |
| hsa- miR-203    | 2.480              |
| hsa- miR-22     | 8.503              |
| hsa- miR-672    | 0.331              |

Supplementary Table III. Shows the validated list of miRs that were confirmed to be differentially expressed exclusively in Mox-LDL treated HUVECs with their fold change in expression levels as compared to the control condition (Control mock-treated). HUVEC were incubated for 24 hours in culture medium supplemented with mock medium, native LDL or Mox-LDL. Individual qRT-PCR was used to validate the results of the TLDA high-throughput experiments. Total RNA was extracted and analyzed by qRT-PCR conducted on each of the differentially expressed miRs using specific primers.
